# Supplementary material for: Proteomic responses of blue mussel (Mytilus) congeners to temperature acclimation
Source: Oxford University Press journal article supplement (doi:10.1242/jeb.062273), 2012-03-07
Supplement: jeb062273tabless1-s2.pdf [file jeb062273tabless1-s2.pdf]

Table S1. Protein identifications (using MS/MS) of spots changing with temperature acclimation in *Mytilus trossulus*

| Spot ID | Protein ID                              | Estimated molecular weight (kDa) | Estimated pI | Predicted molecular weight (kDa) | Predicted pI | GenBank ID   | Mascot score | Peptide matches | Sequence coverage(%) | Average volume (relative to 13°C) |      | Functional category           |
|---------|-----------------------------------------|----------------------------------|--------------|----------------------------------|--------------|--------------|--------------|-----------------|----------------------|-----------------------------------|------|-------------------------------|
|         |                                         |                                  |              |                                  |              |              |              |                 |                      | 7°C                               | 19°C |                               |
| 2       | Hsp70                                   | 70                               | 5.73         | 70                               | 5.30         | gil145885532 | 273          | 3               | 16                   | 0.84                              | 3.39 | Molecular chaperone           |
| 5       | mitochondrial Aldehyde dehydrogenase    | 57                               | 5.59         | 56                               | 6.70         | gil58307245  | 89           | 2               | 9                    | 1.16                              | 0.29 | Proteolysis/energy metabolism |
| 8       | Ubiquinol cytochrome <i>c</i> reductase | 49                               | 5.72         | 48                               | 5.93         | gil223027244 | 182          | 4               | 23                   | 0.54                              | 2.46 | Energy metabolism             |
| 12      | $\beta$ -Tubulin                        | 53                               | 5.12         | 43                               | 5.76         | gil164592164 | 228          | 5               | 17                   | 0.95                              | 1.66 | Cytoskeletal                  |
| 13      | $\beta$ -Tubulin                        | 54                               | 5.13         | 43                               | 5.76         | gil164592164 | 314          | 8               | 25                   | 0.94                              | 1.80 | Cytoskeletal                  |
| 14      | $\beta$ -Tubulin                        | 50                               | 5.00         | 43                               | 5.76         | gil164592164 | 304          | 7               | 22                   | 0.89                              | 2.35 | Cytoskeletal                  |
| 15      | $\alpha$ -Tubulin                       | 67                               | 5.18         | 58                               | 4.90         | gil238782438 | 486          | 7               | 27                   | 1.37                              | 2.48 | Cytoskeletal                  |
| 16      | $\alpha$ -Tubulin                       | 66                               | 5.24         | 58                               | 4.90         | gil238782438 | 404          | 5               | 19                   | 0.90                              | 2.86 | Cytoskeletal                  |
| 17      | $\beta$ -Tubulin                        | 53                               | 4.95         | 43                               | 5.76         | gil164592164 | 196          | 4               | 17                   | 0.55                              | 1.38 | Cytoskeletal                  |
| 18      | Hsp25                                   | 57                               | 5.69         | 22                               | 6.52         | gil212814271 | 115          | 2               | 9                    | 1.08                              | 0.45 | Molecular chaperone           |
| 24      | $\beta$ -Tubulin                        | 51                               | 5.59         | 54                               | 4.92         | gil145890511 | 181          | 4               | 12                   | 1.39                              | 5.39 | Cytoskeletal                  |
| 25      | Ubiquinol cytochrome <i>c</i> reductase | 50                               | 5.4          | 48                               | 9.00         | gil212817136 | 68           | 2               | 4                    | 1.14                              | 2.91 | Proteolysis/energy metabolism |
| 27      | Heavy metal binding protein             | 37                               | 5.31         | 27                               | 5.00         | gil58308171  | 152          | 2               | 13                   | 0.68                              | 0.65 | Unspecified                   |
| 28      | Hsp25                                   | 31                               | 5.26         | 22                               | 6.52         | gil212814271 | 108          | 2               | 9                    | 0.53                              | 0.49 | Molecular chaperone           |
| 32      | Dyp-type peroxidase                     | 35                               | 6.48         | 42                               | 7.00         | gil145886780 | 95           | 3               | 12                   | 0.59                              | 2.56 | Energy metabolism             |
| 36      | Quinoid dihydropteridine reductase      | 31                               | 6.62         | 25                               | 6.58         | gil212827262 | 116          | 3               | 10                   | 0.88                              | 0.25 | Energy metabolism             |
| 37      | Dyp-type peroxidase                     | 33                               | 6.49         | 42                               | 7.00         | gil145886780 | 111          | 3               | 12                   | 1.06                              | 0.30 | Energy metabolism             |
| 40      | Hsp25                                   | 33                               | 6.31         | 22                               | 6.52         | gil212814271 | 82           | 2               | 9                    | 1.08                              | 2.82 | Molecular chaperone           |
| 43      | Hsc71                                   | 76                               | 5.33         | 71                               | 5.29         | gil212816159 | 79           | 5               | 16                   | 1.12                              | 0.40 | Molecular chaperone           |
| 45      | Gelsolin                                | 49                               | 6.16         | 42                               | 5.22         | gil149382505 | 228          | 3               | 17                   | 1.69                              | 8.44 | Cytoskeletal                  |
| 52      | Hsp70                                   | 60                               | 5.98         | 70                               | 5.30         | gil145885532 | 170          | 2               | 10                   | 1.10                              | 0.26 | Molecular chaperone           |
| 54      | Tektin-3                                | 53                               | 5.9          | 57                               | 7.22         | gil212812350 | 98           | 2               | 13                   | 1.04                              | 0.53 | Cytoskeletal                  |
| 55      | Ubiquinol cytochrome <i>c</i> reductase | 47                               | 5.81         | 48                               | 5.93         | gil223027244 | 182          | 4               | 23                   | 0.60                              | 1.86 | Proteolysis/energy metabolism |
| 58      | Ubiquinol cytochrome <i>c</i> reductase | 49                               | 5.95         | 48                               | 5.93         | gil223027244 | 89           | 2               | 13                   | 1.20                              | 3.46 | Proteolysis/energy metabolism |
| 59      | $\beta$ -Actin                          | 49                               | 5.88         | 39                               | 5.80         | gil49868     | 92           | 2               | 7                    | 0.57                              | 3.06 | Cytoskeletal                  |

|    |                                       |    |      |    |      |              |     |   |    |      |      |                   |
|----|---------------------------------------|----|------|----|------|--------------|-----|---|----|------|------|-------------------|
| 60 | Radial spoke head<br>9                | 38 | 6.07 | 31 | 4.97 | gil223025866 | 78  | 2 | 9  | 0.78 | 0.38 | Unspecified       |
| 61 | $\beta$ -Actin                        | 50 | 5.82 | 39 | 5.80 | gil49868     | 154 | 4 | 15 | 0.81 | 0.37 | Cytoskeletal      |
| 67 | $\alpha$ -Tubulin                     | 47 | 5.41 | 58 | 4.90 | gil238782438 | 404 | 5 | 19 | 1.59 | 0.56 | Cytoskeletal      |
| 68 | Isocitrate<br>dehydrogenase<br>(NADP) | 45 | 6.61 | 51 | 7.91 | gil223026036 | 178 | 4 | 18 | 1.41 | 1.30 | Energy metabolism |
| 73 | Isocitrate<br>dehydrogenase<br>(NADP) | 44 | 6.49 | 51 | 7.91 | gil223026036 | 77  | 3 | 13 | 1.79 | 1.14 | Energy metabolism |
| 76 | 78kD glucose<br>regulated protein     | 88 | 6.48 | 73 | 5.00 | gil46359618  | 73  | 2 | 3  | 2.44 | 0.88 | Unspecified       |
| 78 | $\beta$ -Tubulin                      | 57 | 4.79 | 43 | 5.69 | gil58307872  | 151 | 5 | 23 | 1.10 | 0.37 | Cytoskeletal      |
| 79 | 78kD glucose<br>regulated protein     | 89 | 4.85 | 73 | 5.00 | gil238639954 | 245 | 4 | 24 | 0.88 | 2.53 | Unspecified       |

pI, isoelectric point.

Table S2. Protein identifications (using MS/MS) of spots changing with temperature acclimation in *Mytilus galloprovincialis*

| Spot ID | Protein ID                              | Estimated molecular weight (kDa) | Estimated pI | Predicted molecular weight (kDa) | Predicted pI | GenBank ID   | Mascot score | Peptide matches | Sequence coverage (%) | Average volume (relative to 13°C) |       | Functional category |
|---------|-----------------------------------------|----------------------------------|--------------|----------------------------------|--------------|--------------|--------------|-----------------|-----------------------|-----------------------------------|-------|---------------------|
|         |                                         |                                  |              |                                  |              |              |              |                 |                       | 7°C                               | 19°C  |                     |
| 2       | Prohibitin                              | 30                               | 5.43         | 30                               | 5.30         | gi 238643256 | 211          | 5               | 17                    | 0.99                              | 0.25  | Molecular chaperone |
| 4       | Carbonyl reductase                      | 31                               | 5.18         | 30                               | 8.50         | gi 145883693 | 59           | 2               | 8                     | 0.75                              | 0.28  | Energy metabolism   |
| 9       | NADH dehydrogenase                      | 28                               | 4.75         | 24                               | 5.74         | gi 223028674 | 43           | 2               | 14                    | 0.55                              | 0.25  | Energy metabolism   |
| 11      | Actin                                   | 29                               | 5.55         | 42                               | 5.30         | gi 212814343 | 104          | 4               | 19                    | 0.61                              | 0.30  | Cytoskeletal        |
| 12      | Hsp21                                   | 34                               | 5.52         | 21                               | 6.70         | gi 238642855 | 107          | 3               | 16                    | 0.48                              | 0.22  | Molecular chaperone |
| 26      | Succinate dehydrogenase (Ubiquinone)    | 66                               | 5.89         | 72                               | 6.70         | gi 18426858  | 80           | 3               | 5                     | 0.39                              | 4.08  | Energy metabolism   |
| 30      | $\alpha$ -Tubulin                       | 56                               | 5.08         | 57                               | 5.00         | gi 145887917 | 233          | 5               | 18                    | 0.45                              | 0.64  | Cytoskeletal        |
| 34      | Selenium binding protein-1              | 55                               | 5.78         | 54                               | 6.50         | gi 58307672  | 51           | 2               | 11                    | 1.09                              | 0.57  | Unspecified         |
| 37      | $\alpha$ -Tubulin                       | 53                               | 4.94         | 58                               | 4.90         | gi 238782438 | 260          | 6               | 25                    | 0.37                              | 0.38  | Cytoskeletal        |
| 38      | $\alpha$ -Tubulin                       | 56                               | 5            | 57                               | 5.00         | gi 145887917 | 238          | 5               | 15                    | 0.33                              | 0.48  | Cytoskeletal        |
| 39      | $\alpha$ -Tubulin                       | 56                               | 4.98         | 57                               | 5.00         | gi 145887917 | 159          | 5               | 15                    | 0.47                              | 0.16  | Cytoskeletal        |
| 41      | $\alpha$ -Tubulin                       | 55                               | 5.16         | 57                               | 5.00         | gi 212817436 | 204          | 5               | 18                    | 0.35                              | 0.37  | Cytoskeletal        |
| 44      | $\alpha$ -Tubulin                       | 55                               | 5.03         | 53                               | 5.00         | gi 58307555  | 89           | 2               | 13                    | 0.30                              | 0.19  | Cytoskeletal        |
| 45      | $\alpha$ -Tubulin                       | 53                               | 4.82         | 47                               | 5.23         | gi 154349830 | 158          | 3               | 12                    | 0.75                              | 0.19  | Cytoskeletal        |
| 46      | $\beta$ -Tubulin                        | 53                               | 4.85         | 43                               | 5.76         | gi 164592164 | 180          | 6               | 17                    | 0.44                              | 0.04  | Cytoskeletal        |
| 48      | $\alpha$ -Tubulin                       | 53                               | 4.88         | 47                               | 5.23         | gi 154349830 | 202          | 3               | 12                    | 0.35                              | 0.22  | Cytoskeletal        |
| 52      | $\beta$ -Tubulin                        | 53                               | 4.73         | 54                               | 4.92         | gi 145890511 | 95           | 4               | 8                     | 0.73                              | 0.29  | Cytoskeletal        |
| 54      | $\beta$ -Tubulin                        | 52                               | 5.03         | 54                               | 4.90         | gi 145890511 | 124          | 4               | 12                    | 0.35                              | 1.25  | Cytoskeletal        |
| 55      | Ubiquinol cytochrome <i>c</i> reductase | 52                               | 5.74         | 53                               | 5.40         | gi 145883486 | 56           | 2               | 9                     | 0.19                              | 5.51  | Energy metabolism   |
| 56      | Tropomyosin                             | 51                               | 5.1          | 33                               | 4.70         | gi 14285796  | 167          | 6               | 15                    | 0.40                              | 6.03  | Cytoskeletal        |
| 58      | Intermediate filament                   | 51                               | 5.16         | 71                               | 5.40         | gi 212812257 | 53           | 3               | 16                    | 0.42                              | 6.61  | Cytoskeletal        |
| 59      | ATP synthase $\beta$ -subunit           | 50                               | 4.84         | 57                               | 5.38         | gi 212812392 | 490          | 8               | 42                    | 0.40                              | 0.61  | Energy metabolism   |
| 62      | Mitochondrial aldehyde dehydrogenase    | 50                               | 5.56         | 56                               | 6.70         | gi 58307245  | 74           | 2               | 9                     | 0.63                              | 12.55 | Energy metabolism   |
| 66      | $\beta$ -Tubulin                        | 49                               | 4.97         | 43                               | 5.80         | gi 164592164 | 247          | 7               | 17                    | 0.40                              | 7.95  | Cytoskeletal        |
| 75      | Isocitrate dehydrogenase (NADP)         | 46                               | 6.79         | 51                               | 7.91         | gi 223026036 | 102          | 3               | 13                    | 8.33                              | 4.67  | Energy metabolism   |
| 77      | Actin                                   | 45                               | 5.24         | 42                               | 5.30         | gi 145892505 | 78           | 5               | 13                    | 0.95                              | 0.50  | Cytoskeletal        |
| 78      | Ubiquinol cytochrome <i>c</i> reductase | 46                               | 5.68         | 53                               | 5.40         | gi 164595882 | 80           | 3               | 9                     | 1.59                              | 13.13 | Energy metabolism   |
| 87      | Actin                                   | 43                               | 5.22         | 42                               | 5.30         | gi 212827318 | 210          | 4               | 18                    | 0.73                              | 4.15  | Cytoskeletal        |
| 88      | Actin                                   | 43                               | 5.27         | 42                               | 5.30         | gi 212827318 | 166          | 4               | 18                    | 0.66                              | 3.52  | Cytoskeletal        |
| 89      | Actin                                   | 43                               | 5.41         | 42                               | 5.30         | gi 212827318 | 185          | 4               | 18                    | 0.20                              | 2.04  | Cytoskeletal        |
| 93      | $\alpha$ -Tubulin                       | 39                               | 5.39         | 58                               | 4.90         | gi 238782438 | 261          | 7               | 29                    | 0.71                              | 5.44  | Cytoskeletal        |
| 103     | $\beta$ -Tubulin                        | 36                               | 5.36         | 43                               | 5.80         | gi 164592164 | 151          | 6               | 22                    | 0.88                              | 2.96  | Cytoskeletal        |
| 106     | Radial spoke head 9                     | 36                               | 5.98         | 31                               | 4.97         | gi 223025866 | 250          | 6               | 29                    | 1.49                              | 0.49  | Unspecified         |
| 113     | Esterase D/formylglutathione            | 33                               | 6.42         | 31                               | 6.00         | gi 223022457 | 67           | 2               | 12                    | 0.18                              | 0.16  | Energy metabolism   |

| hydrolase |                                          |     |      |    |      |              |     |   |    |      |      |                     |
|-----------|------------------------------------------|-----|------|----|------|--------------|-----|---|----|------|------|---------------------|
| 120       | β-Tubulin                                | 32  | 4.9  | 43 | 5.80 | gil164592164 | 185 | 6 | 20 | 1.01 | 0.22 | Cytoskeletal        |
| 123       | Fibrinogen related domain                | 31  | 6.79 | 27 | 6.10 | gil154349256 | 75  | 3 | 7  | 4.35 | 3.39 | Cytoskeletal        |
| 124       | Hsp21                                    | 31  | 5.85 | 21 | 6.70 | gil238642855 | 226 | 4 | 28 | 1.25 | 0.14 | Molecular chaperone |
| 125       | Proteasome α-type-4                      | 32  | 6.26 | 30 | 6.90 | gil164594998 | 65  | 2 | 9  | 2.17 | 1.22 | Protein degradation |
| 126       | Cyclophilin 3                            | 30  | 6.74 | 27 | 5.10 | gil145882165 | 186 | 5 | 15 | 4.76 | 5.57 | Cytoskeletal        |
| 128       | Proteasome α-type-6                      | 30  | 6.31 | 27 | 6.35 | gil212811956 | 111 | 2 | 9  | 1.28 | 0.41 | Protein degradation |
| 132       | T complex protein-1                      | 29  | 6.2  | 53 | 5.46 | gil212817064 | 54  | 2 | 9  | 1.19 | 0.04 | Unspecified         |
| 133       | Mitochondrial aldehyde dehydrogenase     | 28  | 6.48 | 56 | 6.69 | gil58307245  | 58  | 2 | 9  | 1.35 | 0.26 | Energy metabolism   |
| 135       | Thioredoxin peroxidase                   | 26  | 6.63 | 32 | 5.50 | gil145895058 | 89  | 4 | 12 | 2.56 | 0.33 | Energy metabolism   |
| 141       | Prolyl 4-hydroxylase β-subunit precursor | 56  | 4.55 | 57 | 4.80 | gil212815598 | 73  | 2 | 9  | 0.84 | 0.44 | Energy metabolism   |
| 143       | ATP synthase β-subunit                   | 48  | 4.83 | 57 | 5.40 | gil212812392 | 306 | 7 | 32 | 0.85 | 4.44 | Energy metabolism   |
| 144       | Major Vault Protein                      | 108 | 5.73 | 96 | 5.70 | gil223026493 | 61  | 3 | 13 | 2.78 | 1.61 | Unspecified         |
| 145       | Pyruvate dehydrogenase                   | 35  | 5.45 | 39 | 5.80 | gil58307688  | 44  | 2 | 3  | 1.02 | 0.58 | Energy metabolism   |
| 146       | Actin                                    | 41  | 5.01 | 42 | 5.30 | gil145892505 | 252 | 6 | 21 | 0.44 | 0.49 | Cytoskeletal        |

pI, isoelectric point.
